# Supplementary material for: Adversity Makes Strange Bedfellows: How to Infer Positive Relationships in Social Networks from Negative Relationships
Source: Research Square preprint supplement (doi:10.21203/rs.3.rs-6366041/v1), 2025-06-10
Supplement: Supplementary file 1 [file 3dd35f49de64156b94fdf7e7.pdf]

**Appendix 1** Relational mobility scale in questionnaire format.

| How much do each of the following statements accurately describe the people in the immediate society (your school, workplace, town, neighborhood, etc.) in which you live?<br><br>Please indicate how true you feel each statement to be for <u>the people around you</u> by circling the appropriate number to the right of each statement. | Strongly Disagree | Moderately Disagree | Slightly Disagree | Slightly Agree | Moderately Agree | Strongly Agree |
|----------------------------------------------------------------------------------------------------------------------------------------------------------------------------------------------------------------------------------------------------------------------------------------------------------------------------------------------|-------------------|---------------------|-------------------|----------------|------------------|----------------|
| 1. They have many chances to get to know other people                                                                                                                                                                                                                                                                                        | 1                 | 2                   | 3                 | 4              | 5                | 6              |
| 2. It is common for these people to have a conversation with someone they have never met before                                                                                                                                                                                                                                              | 1                 | 2                   | 3                 | 4              | 5                | 6              |
| 3. They can choose who they interact with.                                                                                                                                                                                                                                                                                                   | 1                 | 2                   | 3                 | 4              | 5                | 6              |
| 4. There are few opportunities for these people to form new friendships                                                                                                                                                                                                                                                                      | 1                 | 2                   | 3                 | 4              | 5                | 6              |
| 5. It is uncommon for these people to have a conversation with people they have never met before                                                                                                                                                                                                                                             | 1                 | 2                   | 3                 | 4              | 5                | 6              |
| 6. If they did not like their current groups, they would leave for better ones                                                                                                                                                                                                                                                               | 1                 | 2                   | 3                 | 4              | 5                | 6              |
| 7. It is often the case that they cannot freely choose who they associate with                                                                                                                                                                                                                                                               | 1                 | 2                   | 3                 | 4              | 5                | 6              |
| 8. It is easy for them to meet new people.                                                                                                                                                                                                                                                                                                   | 1                 | 2                   | 3                 | 4              | 5                | 6              |
| 9. Even if these people were not completely satisfied with the group they belonged to, they would usually stay with it anyway                                                                                                                                                                                                                | 1                 | 2                   | 3                 | 4              | 5                | 6              |
| 10. These people are able to choose the groups and organizations they belong to                                                                                                                                                                                                                                                              | 1                 | 2                   | 3                 | 4              | 5                | 6              |
| 11. Even if these people were not satisfied with their current relationships, they would often have no choice but to stay with them                                                                                                                                                                                                          | 1                 | 2                   | 3                 | 4              | 5                | 6              |
| 12. Even though they might rather leave, these people often have no choice but to stay in groups they don't like                                                                                                                                                                                                                             | 1                 | 2                   | 3                 | 4              | 5                | 6              |

Note. Items 4, 5, 7, 9, 11, and 12 are reversed.

**Appendix 2** Social connection scale.

| What is described below is your thoughts and feelings about your relationship with yourself and others. Please read each sentence carefully and choose a number that is most in line with your actual situation and tick "✓". "1" stands for "totally disagree" and "6" stands for. | <b>Totally disagree</b> | <b>Relatively disagree</b> | <b>Somewhat disagree</b> | <b>Somewhat agree</b> | <b>Relatively agree</b> | <b>Totally agree</b> |
|-------------------------------------------------------------------------------------------------------------------------------------------------------------------------------------------------------------------------------------------------------------------------------------|-------------------------|----------------------------|--------------------------|-----------------------|-------------------------|----------------------|
| I feel alienated from others.                                                                                                                                                                                                                                                       | 1                       | 2                          | 3                        | 4                     | 5                       | 6                    |
| I feel irrelevant to most people.                                                                                                                                                                                                                                                   | 1                       | 2                          | 3                        | 4                     | 5                       | 6                    |
| I feel like an outsider.                                                                                                                                                                                                                                                            | 1                       | 2                          | 3                        | 4                     | 5                       | 6                    |
| I feel like an unsociable and lonely person.                                                                                                                                                                                                                                        | 1                       | 2                          | 3                        | 4                     | 5                       | 6                    |
| I feel isolated from the world around me.                                                                                                                                                                                                                                           | 1                       | 2                          | 3                        | 4                     | 5                       | 6                    |
| I feel it is difficult for me to blend in with anyone or group around me.                                                                                                                                                                                                           | 1                       | 2                          | 3                        | 4                     | 5                       | 6                    |
| I don't feel a sense of belonging even among familiar people.                                                                                                                                                                                                                       | 1                       | 2                          | 3                        | 4                     | 5                       | 6                    |
| I found myself out of touch with society.                                                                                                                                                                                                                                           | 1                       | 2                          | 3                        | 4                     | 5                       | 6                    |
| I find that I can actively integrate into people's lives.                                                                                                                                                                                                                           | 1                       | 2                          | 3                        | 4                     | 5                       | 6                    |

Note. Except F9 positive scoring, all others are negative scoring. The higher the score, the higher the level of social connection.
